# Supplementary material for: Zipper-interacting protein kinase mediates neuronal cell death and cognitive dysfunction in traumatic brain injury via regulating DEDD
Source: Springer Nature journal article supplement (doi:10.1038/s41419-025-07474-7), 2025-03-04
Supplement: MOESM1 [file 41419_2025_7474_MOESM1_ESM.pdf]

Supplementary information

**Zipper-interacting protein kinase mediates neuronal cell death and cognitive dysfunction in traumatic brain injury via regulating DEDD**

Yingxue Mei<sup>1</sup>, Fei She<sup>1</sup>, Ling Zhang<sup>1</sup>, Gamin Kim<sup>2</sup>, Ruomeng Li<sup>1</sup>, Xiuzhi Zheng<sup>1</sup>, Zonghai Wang<sup>1</sup>, Renxuan Chen<sup>1</sup>, Long Wang<sup>1</sup>, Dongmei Chen<sup>1</sup>, Jungho Kim<sup>2</sup>, Tao Zhang<sup>1,\*</sup>, Tae Ho Lee<sup>1,\*\*</sup>

<sup>1</sup>Fujian Key Laboratory of Translational Research in Cancer and Neurodegenerative Diseases

Institute of Basic Medicine

School of Basic Medical Sciences

Fujian Medical University

Fuzhou 350122, China

<sup>2</sup>Laboratory of Molecular and Cellular Biology

Department of Life Science

Sogang University

Seoul 04107, Korea

**Running title:** ZIPK dysregulation facilitates neuronal loss in TBI

\*Corresponding author: Tao Zhang, Fujian Medical University, 1 Xuefu North Road, Fuzhou, Fujian 350122, China; E-mail: taozh@fjmu.edu.cn; Tel.: +86-591-2286-2498; Fax: +86-591-2286-2320.

\*\*Corresponding author: Tae Ho Lee, Fujian Medical University, 1 Xuefu North Road, Fuzhou, Fujian 350122, China; E-mail: tlee0813@fjmu.edu.cn; Tel.: +86-591-2286-2498; Fax: +86-591-2286-2320.

Table S1. Information of primary antibodies used in the present study.

| Antibody                               | Dilution | Source                    | Identifier |
|----------------------------------------|----------|---------------------------|------------|
| Mouse anti- $\beta$ -actin             | 1: 40000 | Sigma-Aldrich             | A5441      |
| Rabbit anti-ZIPK                       | 1: 2000  | Abcam                     | ab210528   |
| Mouse anti-NeuN                        | 1: 1000  | Millipore                 | MAB377     |
| Mouse anti-GFAP                        | 1: 500   | Santa Cruz Biotechnology  | sc-33673   |
| Mouse anti-Iba1                        | 1: 1000  | Abcam                     | ab283319   |
| Mouse anti-DEDD                        | 1: 200   | Santa Cruz Biotechnology  | sc-271192  |
| Rabbit anti-Cleaved-caspase-3 (Asp175) | 1: 500   | Cell Signaling Technology | 9661       |
| Rabbit anti-Caspase-3                  | 1:1000   | Abcam                     | ab13847    |
| Rabbit anti-Caspase-3                  | 1:1000   | Cell Signaling Technology | 9662       |
| Rabbit-anti-Phospho - (Ser/Thr) Phe    | 1: 3000  | Abcam                     | ab300625   |
| Rabbit anti MAP2                       | 1: 500   | Cell Signaling Technology | 4542       |
| Rabbit anti-Neurofilament-L            | 1: 100   | Cell Signaling Technology | 2837       |
| Mouse anti-Flag-tag                    | 1: 3000  | Cell Signaling Technology | 8146       |
| Mouse anti-HA-tag                      | 1: 1000  | Cell Signaling Technology | 2367       |

Table S2. Sequence information of siRNA.

| si-RNA                | sequence                |
|-----------------------|-------------------------|
| Human si-ZIPK         | CAGAGAUUGUGAACUAUGAdTdT |
|                       | UCAUAGUUCACAAUCUCUGdTdT |
| Human si-DEDD         | CCAUCAAGCUGCUGGUAAT     |
|                       | UUUACCAGCAGCUUGAUGGTT   |
| Negative control (NC) | UUCUCCGAACGUGUCACGU TT  |
|                       | ACGUGACACGUUCGGAGAA TT  |

Table S3. Sequence information of genotyping and qRT-PCR.

|                             |                           |
|-----------------------------|---------------------------|
| Primers-genotyping          | 5'-3'                     |
| Genotyping <i>Zipk-1</i> -F | TTTGAGCCGAGTCCTTGAGCT     |
| Genotyping <i>Zipk-1</i> -R | ATAGGGACCTCAAGTGAGAGTCTGC |
| Genotyping <i>Zipk-2</i> -F | GGAACATCATAGGCCAGAACCAG   |
| Genotyping <i>Zipk-2</i> -R | AACCCAATGGCTCACTCATCAG    |
| Primers-qRT-PCR             | 5'-3'                     |
| Human <i>ZIPK</i> -F        | GCACGACATCTTCGAGAACAA     |
| Human <i>ZIPK</i> -R        | CTTAGAGTGCAGGTAGTGAACG    |
| Human <i>DEDD</i> -F        | GGAGACATCAATTTCGCTATGTGA  |
| Human <i>DEDD</i> -R        | GCAACACACCACAGGATAGTG     |
| Human <i>ACTB</i> -F        | AGGATTCCTATGTGGGCGAC      |
| Human <i>ACTB</i> -R        | ATAGCACAGCCTGGATAGCAA     |
| Mouse <i>Zipk</i> -F        | ACATTCAGGCAAGAGGATGTTG    |
| Mouse <i>Zipk</i> -R        | CTCACCTCGCGTTCGATCT       |
| Mouse <i>Dedd</i> -F        | CACCGCATGTTCGACATCG       |
| Mouse <i>Dedd</i> -R        | GAAGTCACGTCCATTTCCGGAT    |
| Mouse <i>Actb</i> -F        | GTGACGTTGACATCCGTAAAGA    |
| Mouse <i>Actb</i> -R        | GCCGGACTCATCGTACTCC       |

Notes: F, Forward primer. R, Reverse primer.

Tabel S4. Scoring rules and scores of the modified neurological severity score (mNSS).

| Task                            | Description                                                                                             | Points                          |
|---------------------------------|---------------------------------------------------------------------------------------------------------|---------------------------------|
| Tail lift test                  | Forelimb flexion                                                                                        | 1                               |
|                                 | Hind limb flexion                                                                                       | 1                               |
| Walking test                    | Walk normally                                                                                           | 0                               |
|                                 | Unable to walk in a straight line                                                                       | 1                               |
| Round balancing<br>(7 mm stick) | a. Mice are able to balance on a balance bar                                                            | 0                               |
|                                 | b. Mice cling to the bar                                                                                | 1                               |
|                                 | c. One side of the front and back limbs clings to the bar, and the contralateral limb falls off the bar | 2                               |
|                                 | d. Mice hold the bar and either limbs dropped or rotated while holding the bar for more than 30 seconds | 3                               |
|                                 | e. Mice try to balance but eventually fail and fall off the bar within 20-30 seconds                    | 4                               |
|                                 | f. Mice try to balance but eventually fail and fall off the bar within 10-20 seconds                    | 5                               |
|                                 | g. Mice fell directly off the bar within 10 seconds                                                     | 6                               |
| Task                            | Description                                                                                             | Points<br>(success/<br>failure) |
| Beam walk:<br>3 cm              | Able to cross a 30-cm long beam of 3 cm width in 3 min                                                  | 0/1                             |
| Beam walk:<br>2 cm              | Same task but with increased difficulty on a 2 cm wide beam                                             | 0/1                             |
| Beam walk:<br>1 cm              | Same task but with increased difficulty on a 1 cm wide beam                                             | 0/1                             |
| Maximum score                   |                                                                                                         | 12                              |

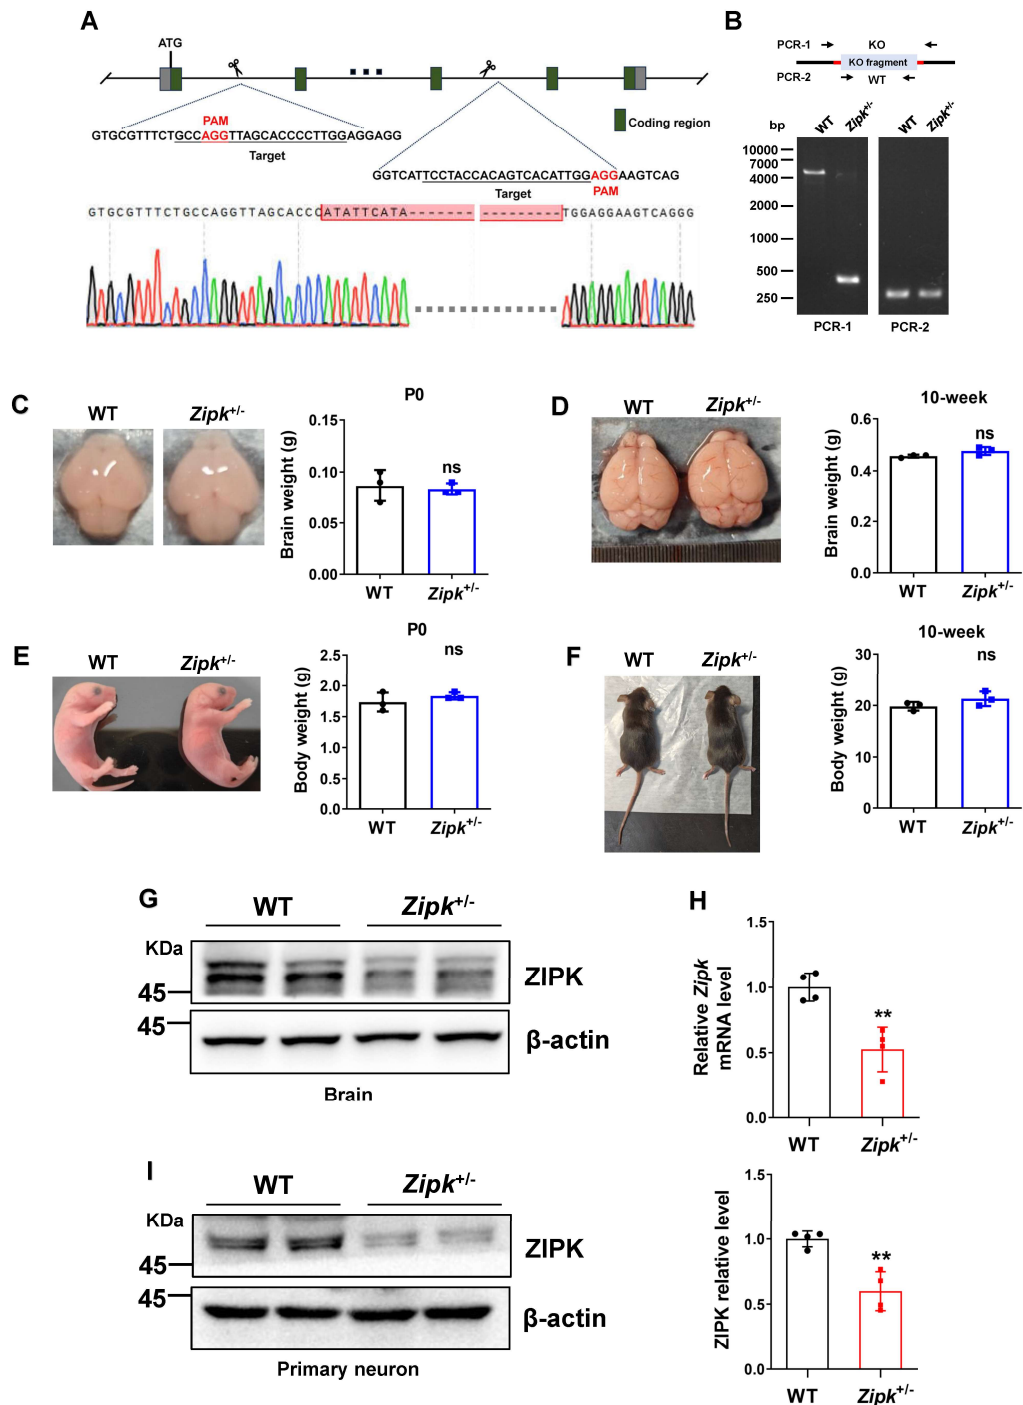

**Fig. S1 Generation of *Zipk*<sup>+/-</sup> mice via the CRISPR/Cas9 system.** (A) The guide RNA target sites are underlined, and the PAM sequences are marked in red. Gene sequencing after editing is shown below. (B) Representative genotyping of WT and *Zipk*<sup>+/-</sup> mice. (C-D) Brain morphology and weight of newborn and 10-week-old WT and *Zipk*<sup>+/-</sup> mice. (E-F) The

appearance and body weight of newborn and 10-week-old WT and *Zipk*<sup>+/-</sup> mice. (G-H) Measurement of ZIPK protein and mRNA levels in brain tissues from 3-month-old WT and *Zipk*<sup>+/-</sup> mice. (I) Immunoblot analysis of ZIPK protein level in WT and *Zipk*<sup>+/-</sup> primary neurons. \*\**p* < 0.01, ns, not significant. Unpaired two-tailed Student's *t*-test was used for analysis.

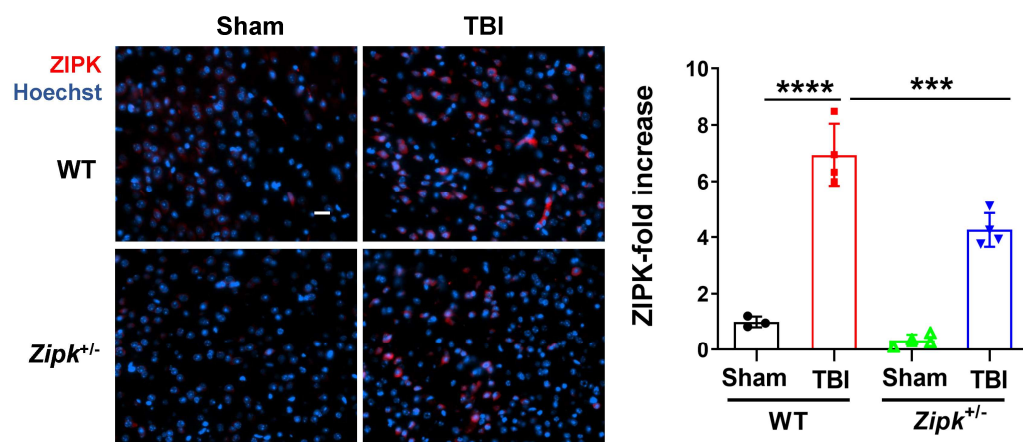

**Fig. S2** The expression of ZIPK in peri-injury sites of WT and *Zipk*<sup>+/-</sup> mice after TBI. WT and *Zipk*<sup>+/-</sup> mice were subjected to CCI and brain samples were collected at 16 days post TBI. Immunofluorescence analysis was performed to analyze the protein expression of ZIPK in peri-injury brain regions. n=3-4 mice/group. The scale bar is 20  $\mu$ m. \*\*\**p* < 0.001, \*\*\*\**p* < 0.0001. One-way ANOVA was used for comparison.

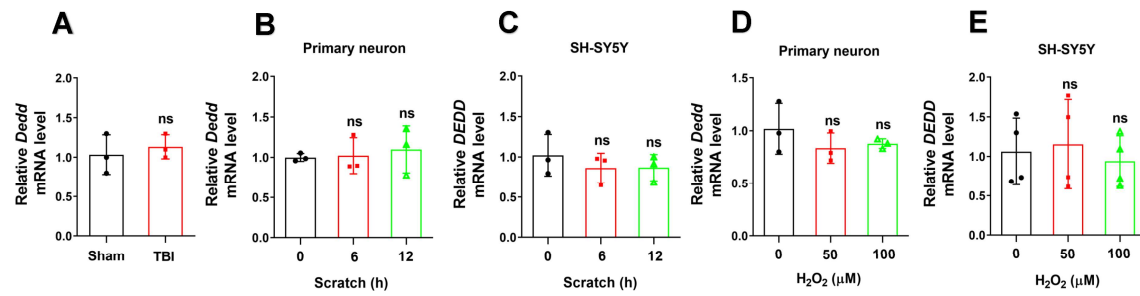

**Fig. S3 *DEDD* mRNA levels in *in vivo* and *in vitro* TBI models.** qRT-PCR was used to determine *DEDD* mRNA levels in mouse (A) and cellular (B-E) TBI models. Unpaired two-tailed Student's *t*-test was used in A. One-way ANOVA was used in B-E. ns, not significant.

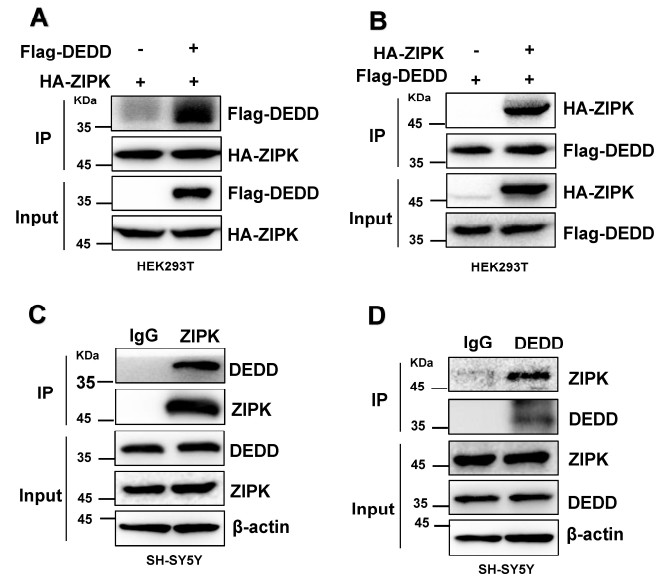

**Fig. S4 ZIPK binds to DEDD.** (A-B) Representative immunoblots of Flag-DEDD and HA-ZIPK in HEK293T cells transiently transfected with Flag-DEDD and HA-ZIPK constructs in Co-IP assays. Anti-HA or -Flag antibody was used for immunoprecipitation, respectively. (C-D) Endogenous binding of ZIPK and DEDD in SH-SY5Y cells using anti-ZIPK or -DEDD antibody in Co-IP assays.



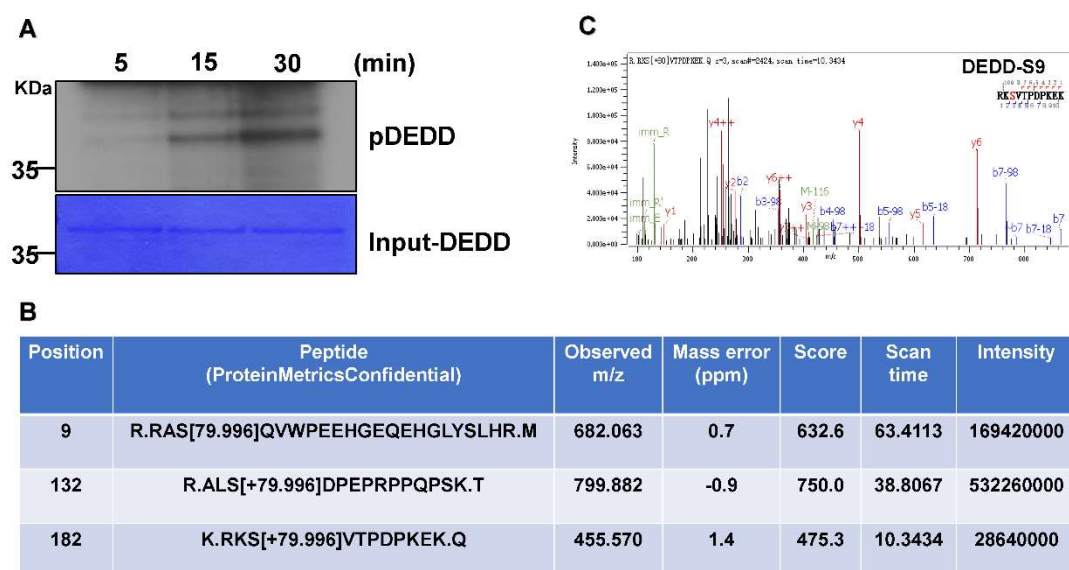

**Fig. S5 ZIPK directly phosphorylates DEDD.** (A) Representative  $^{32}\text{P}$ -autoradiography data showing ZIPK-induced DEDD phosphorylation in a time dependent manner in the *in vitro* kinase assay. (B) Candidate phosphorylation sites in DEDD according to mass spectrometry analysis. (C) Secondary diagram of the DEDD-S9 phosphorylation according to mass spectrometry.

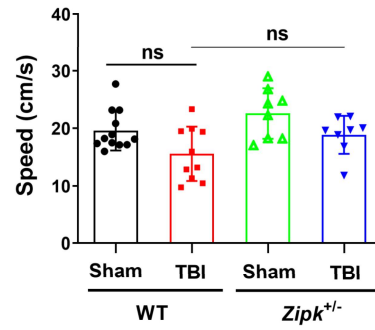

**Fig. S6 The swimming speed of four groups of mice in the Morris water maze test.** n=8-12 mice/group. ns, not significant. One-way ANOVA was used for analysis.
